# Supplementary material
Source: PubMed Central journal article supplement (PMC4631659)
Supplement: NIHMS722925-supplement-125_2015_3740_MOESM1_ESM.pdf [file NIHMS722925-supplement-125_2015_3740_MOESM1_ESM.pdf]

**ESM Table 1** Fasting glucose level (mmol/l) at the time of censoring (1995-2011) for incident diabetes and prediabetes analyses according to self-reported marijuana use at CARDIA examination Year 7 (1992-1993)

| Fasting Glucose (mmol/l) for diabetes analysis at time of censor <sup>a,d</sup>       | Marijuana Use Category |             |             |             | <i>p</i> for trend <sup>b</sup> |
|---------------------------------------------------------------------------------------|------------------------|-------------|-------------|-------------|---------------------------------|
|                                                                                       | Never use              | 1-9 times   | 10-99 times | ≥100 times  |                                 |
| Unadjusted                                                                            | 5.46 ± 0.05            | 5.36 ± 0.04 | 5.34 ± 0.04 | 5.52 ± 0.04 | 0.20                            |
| Age, sex, and race adjusted <sup>c</sup>                                              | 5.44 ± 0.05            | 5.38 ± 0.04 | 5.38 ± 0.04 | 5.49 ± 0.04 | 0.27                            |
| Adjusted further for education, center, smoking, and alcohol <sup>c</sup>             | 5.46 ± 0.05            | 5.39 ± 0.05 | 5.38 ± 0.04 | 5.49 ± 0.04 | 0.79                            |
| Adjusted further for diet, physical activity, and systolic BP (HTN meds) <sup>c</sup> | 5.44 ± 0.05            | 5.38 ± 0.04 | 5.39 ± 0.04 | 5.48 ± 0.04 | 0.39                            |
| Adjusted further for BMI and waist circumference <sup>c</sup>                         | 5.45 ± 0.05            | 5.37 ± 0.04 | 5.40 ± 0.04 | 5.47 ± 0.04 | 0.54                            |
| Adjusted further for LDL and HDL (cholesterol meds) <sup>c</sup>                      | 5.44 ± 0.05            | 5.38 ± 0.04 | 5.41 ± 0.04 | 5.46 ± 0.04 | 0.55                            |
| Adjusted further for other illicit drug use <sup>c</sup>                              | 5.45 ± 0.05            | 5.37 ± 0.05 | 5.40 ± 0.04 | 5.47 ± 0.05 | 0.74                            |

  

| Fasting Glucose (mmol/l) for prediabetes analysis at time of censor <sup>a,d</sup>    | Marijuana Use Category |             |             |             | <i>p</i> for trend <sup>b</sup> |
|---------------------------------------------------------------------------------------|------------------------|-------------|-------------|-------------|---------------------------------|
|                                                                                       | Never use              | 1-9 times   | 10-99 times | ≥100 times  |                                 |
| Unadjusted                                                                            | 5.18 ± 0.02            | 5.22 ± 0.02 | 5.17 ± 0.02 | 5.30 ± 0.02 | <0.001                          |
| Age, sex, and race adjusted <sup>c</sup>                                              | 5.17 ± 0.02            | 5.23 ± 0.02 | 5.20 ± 0.02 | 5.27 ± 0.02 | <0.01                           |
| Adjusted further for education, center, smoking, and alcohol <sup>c</sup>             | 5.18 ± 0.02            | 5.23 ± 0.02 | 5.20 ± 0.02 | 5.27 ± 0.02 | <0.05                           |
| Adjusted further for diet, physical activity, and systolic BP (HTN meds) <sup>c</sup> | 5.17 ± 0.02            | 5.23 ± 0.02 | 5.20 ± 0.02 | 5.27 ± 0.02 | <0.01                           |
| Adjusted further for BMI and waist circumference <sup>c</sup>                         | 5.17 ± 0.02            | 5.22 ± 0.02 | 5.21 ± 0.02 | 5.27 ± 0.02 | <0.01                           |
| Adjusted further for LDL and HDL (cholesterol meds) <sup>c</sup>                      | 5.17 ± 0.02            | 5.23 ± 0.02 | 5.21 ± 0.02 | 5.27 ± 0.02 | <0.05                           |
| Adjusted further for other illicit drug use <sup>c</sup>                              | 5.19 ± 0.03            | 5.23 ± 0.02 | 5.20 ± 0.02 | 5.25 ± 0.02 | 0.15                            |

<sup>a</sup> Average ± SE

<sup>b</sup> A test for linear trend across marijuana use category

<sup>c</sup> All data for adjustments reflect that collected at CARDIA examination Year 7

<sup>d</sup> Fasting glucose was measured at each CARDIA examination including and subsequent to year 7, lending to quantifying fasting glucose at the time of censoring. Data on HbA1c and OGTT are not available at all of these time points precluding from an accurate estimation in the full analytic cohort. For example, at the time of censoring in the diabetes analysis, data on HbA1c and OGTT were unavailable for 15 % and 28% of the analytic cohort, respectively. For the prediabetes analysis, data on HbA1c and OGTT were unavailable for 29% of the analytic cohort at the time of censoring, for each measure.
